# Supplementary material for: Evolutionary Descent of Prion Genes from the ZIP Family of Metal Ion Transporters
Source: PubMed Central journal article supplement (PMC2745754; doi:10.1371/journal.pone.0007208), 2009-09-28

## Supplemental Figure 1

**A** Slc39A10 (ENSMUSP00000027131), MS/MS of 626.35

QSTEESTIGR (aa 536-545) + iTRAQ114(N-term)

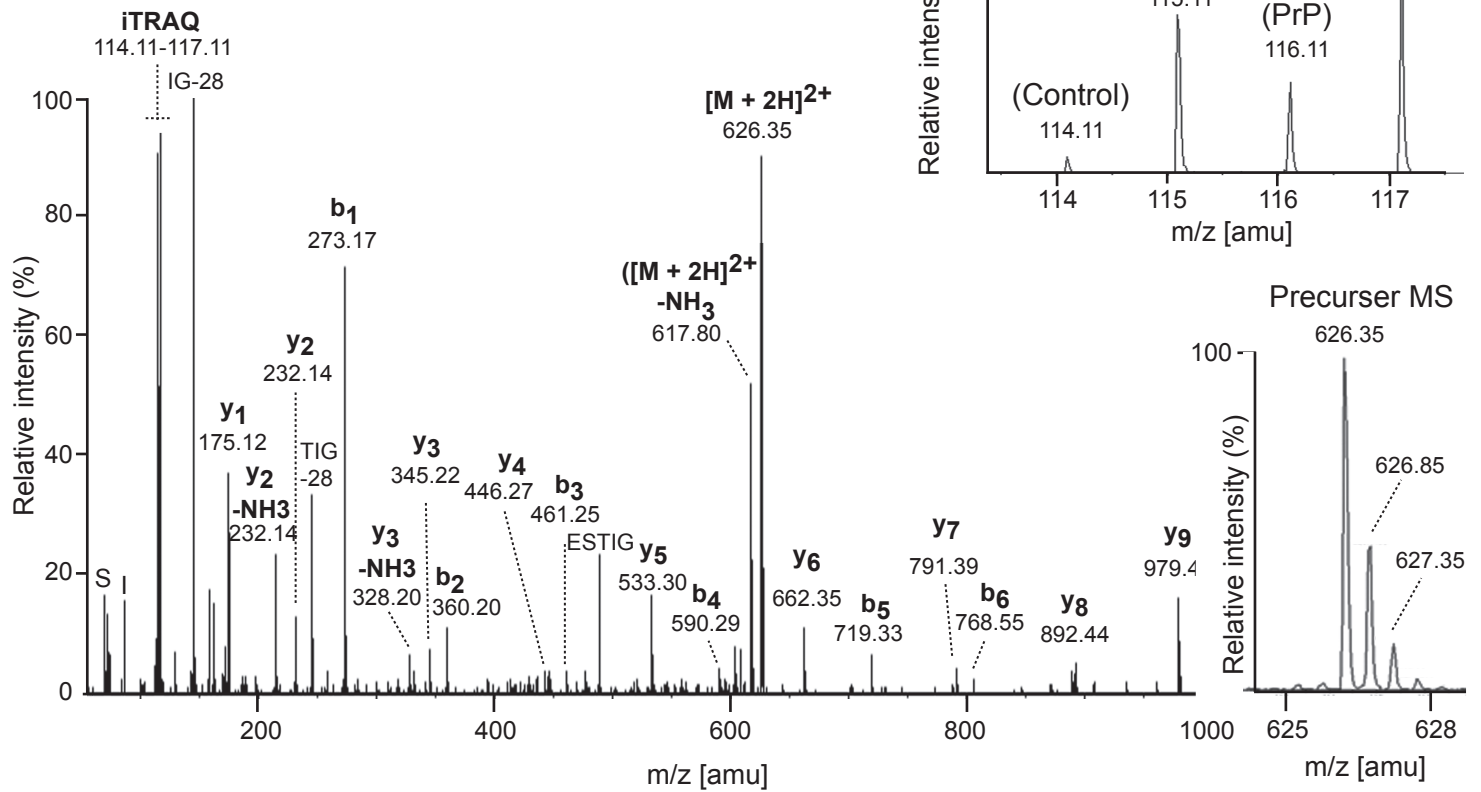

**B**

Slc39A6 (ENSP00000269187), MS/MS of m/z 759.03

ESASSSEVTSAVYNAVSEGTR (aa 187-207) + iTRAQ114(N-term)

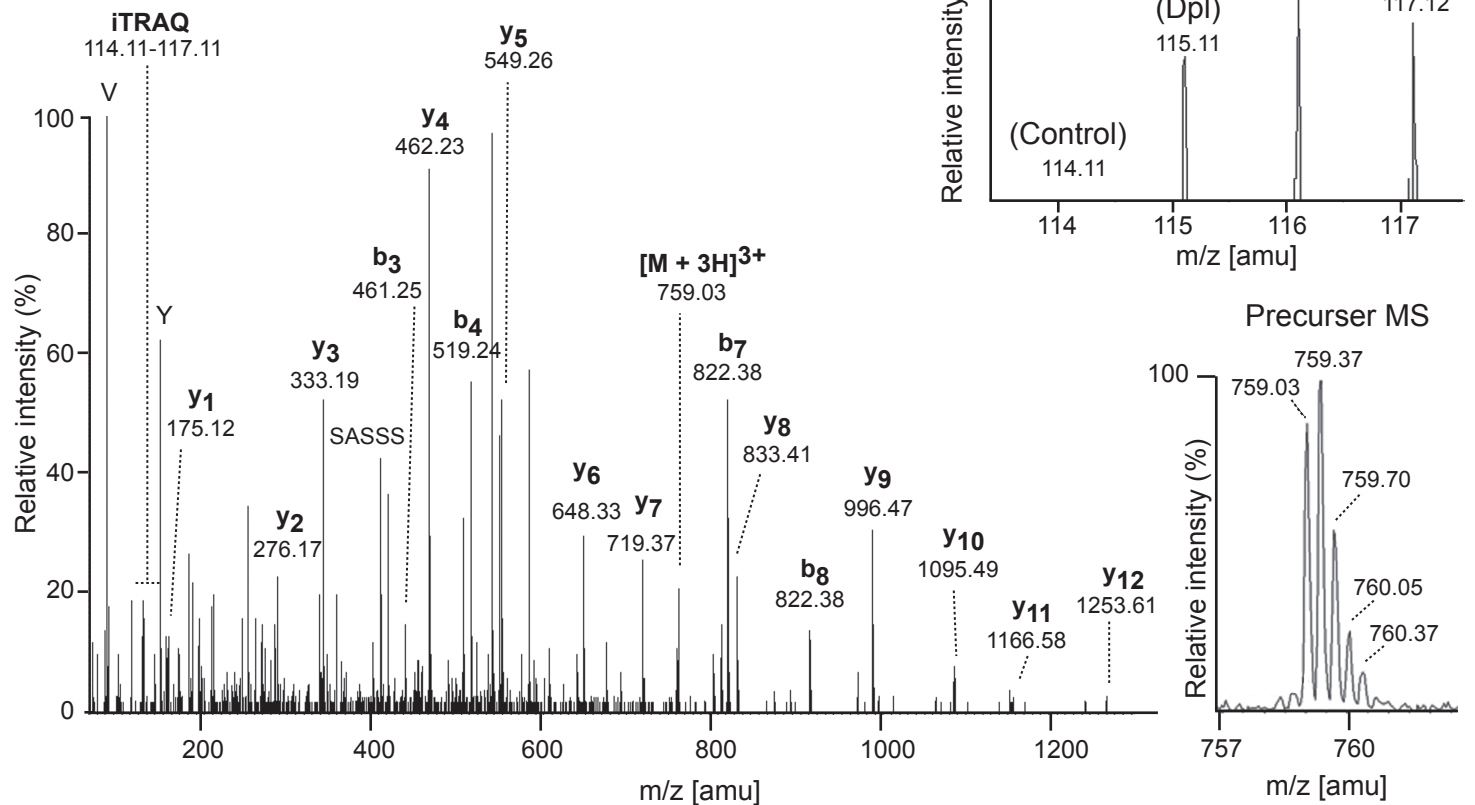

**C**

Actin (ENSMUSP000000), MS/MS of 666.35

TTGIVMDSGDGVTHTVPIQEGYALPHAILR + iTRAQ114(N-term)

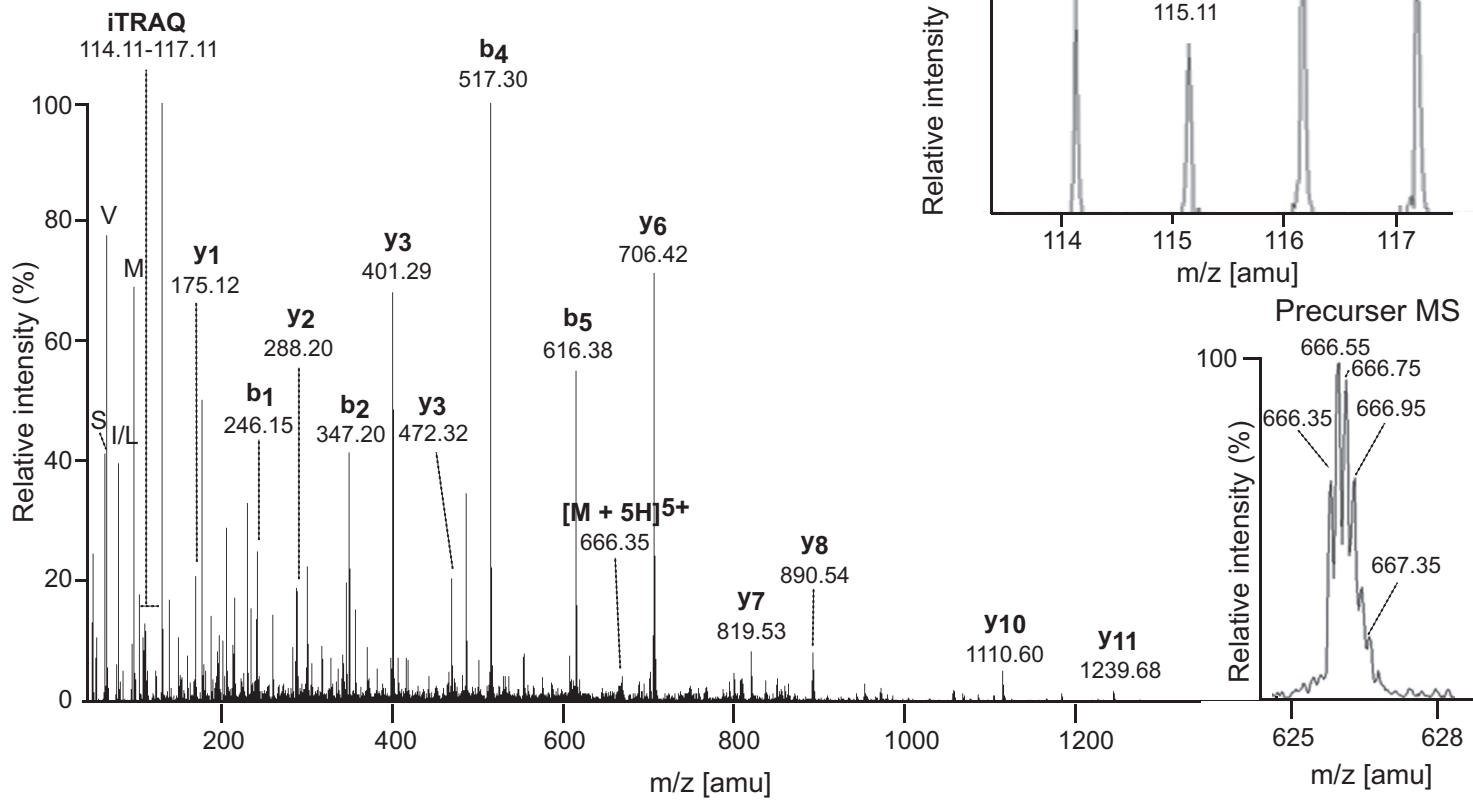

Supplement: pone.0007208.s001.pdf [file pone.0007208.s001.pdf]
