# Supplementary material for: Evolutionary Descent of Prion Genes from the ZIP Family of Metal Ion Transporters
Source: PubMed Central journal article supplement (PMC2745754; doi:10.1371/journal.pone.0007208), 2009-09-28
Supplement: pone.0007208.s002.pdf [file pone.0007208.s002.pdf]

# Supplemental Figure 2

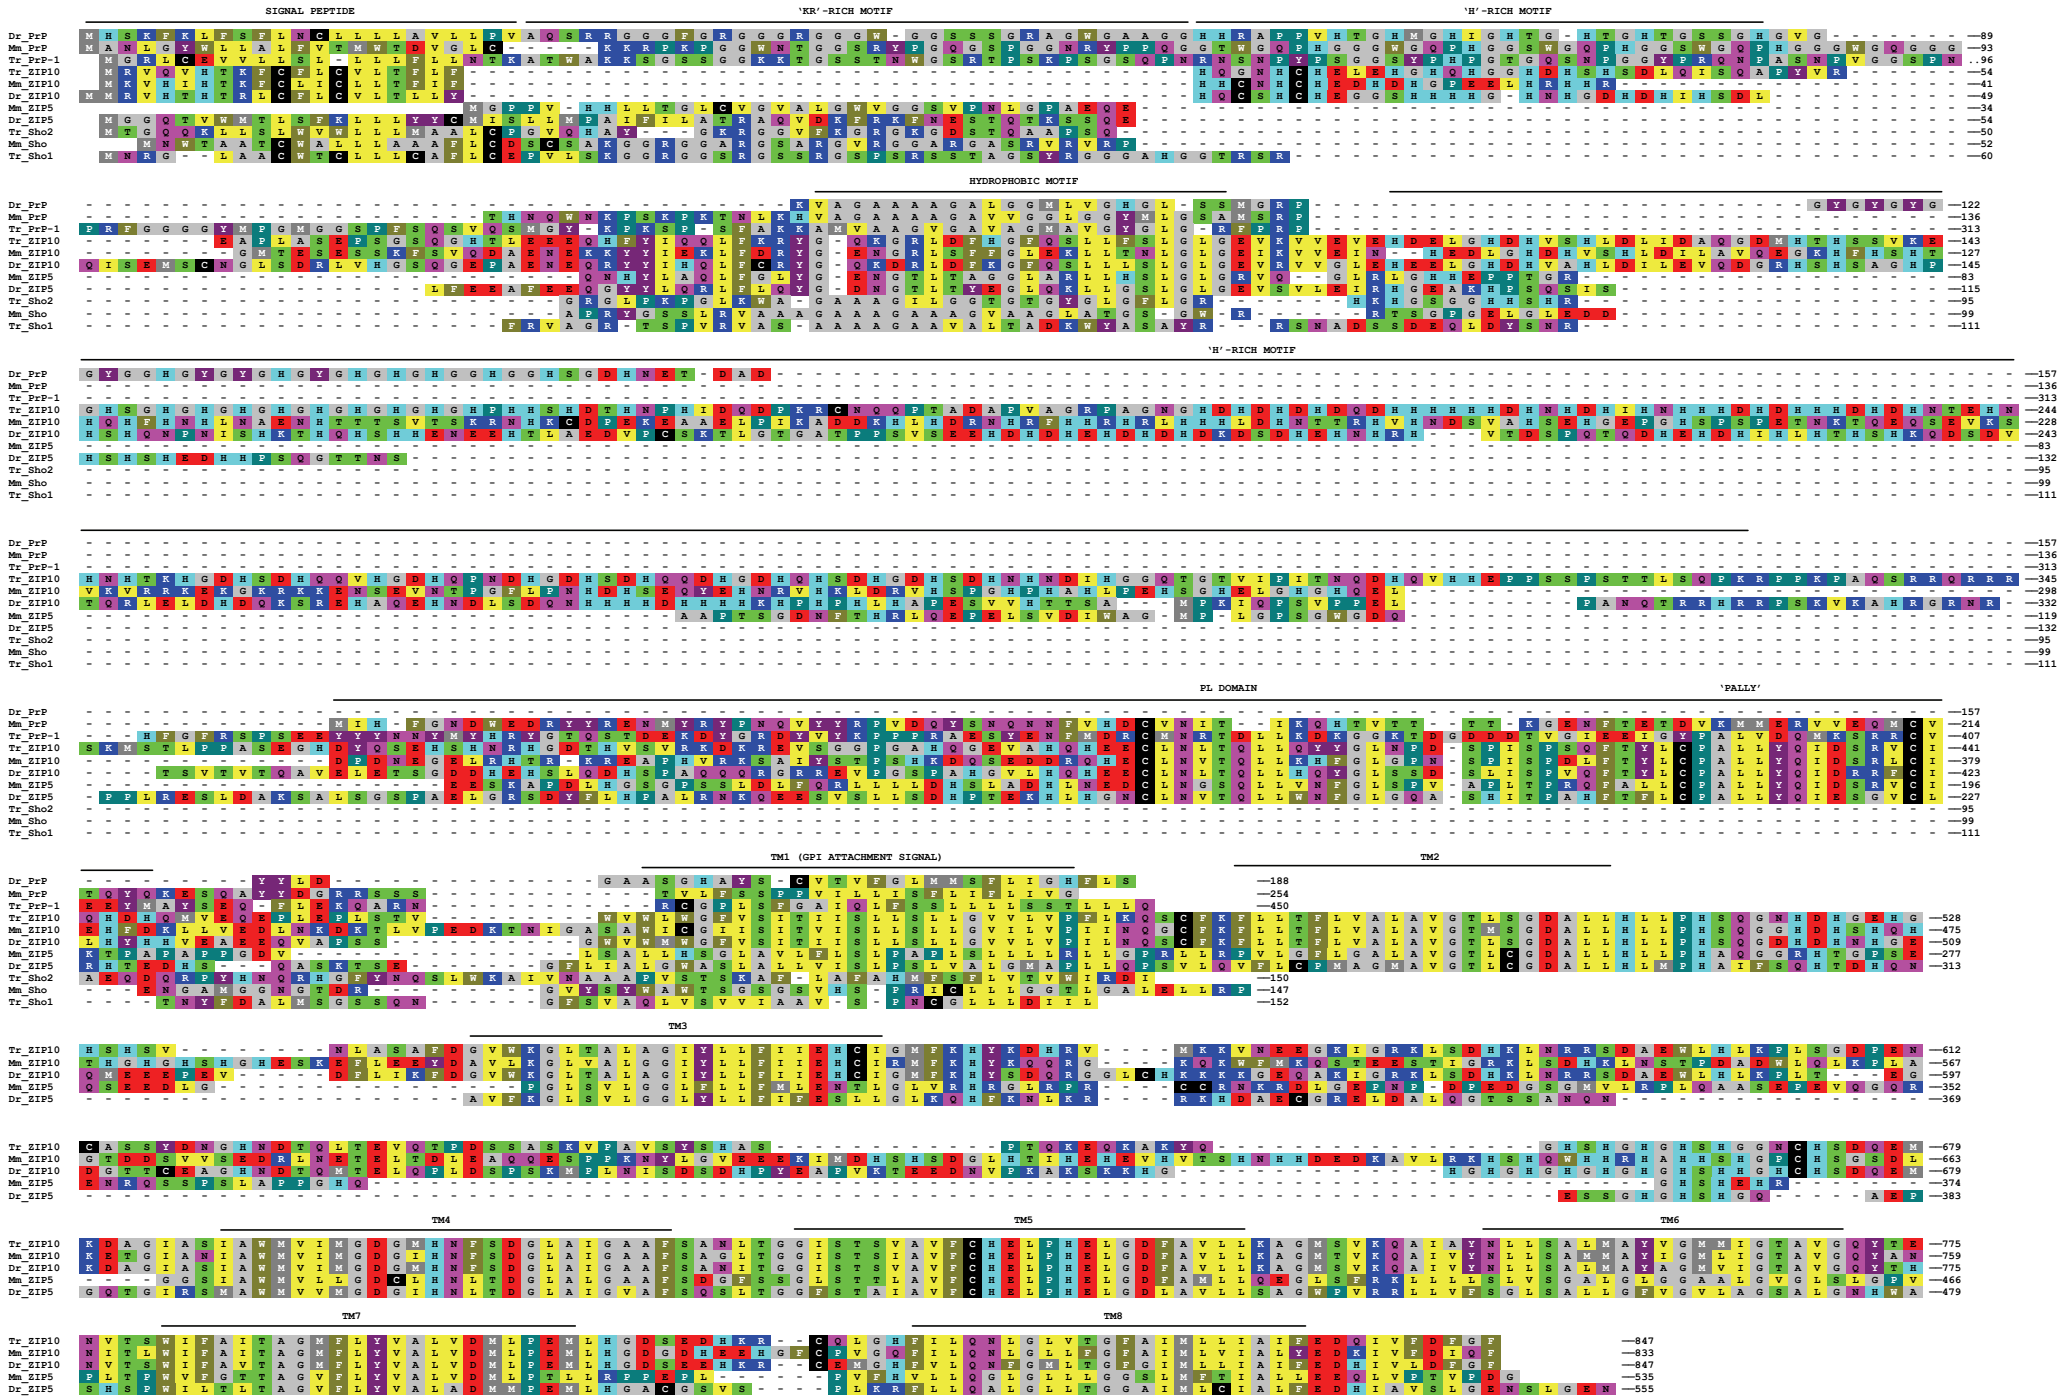

\* Please note that an alternative alignment of residues 124 – 136 of Mm\_PeP with residues 285 – 297 of Mm\_ZIP10 has been presented in Figure 1A since for the structural threading analysis, it was preferred to work with a continuous stretch of primary structure. In this alignment, the emphasis is on evolutionary descent and therefore it was decided that this short sequence segment was best aligned from a phylogenetic perspective.
