# Supplementary material for: Evolutionary Descent of Prion Genes from the ZIP Family of Metal Ion Transporters
Source: PubMed Central journal article supplement (PMC2745754; doi:10.1371/journal.pone.0007208), 2009-09-28
Supplement: pone.0007208.s003.pdf [file pone.0007208.s003.pdf]

# Supplemental Figure 3

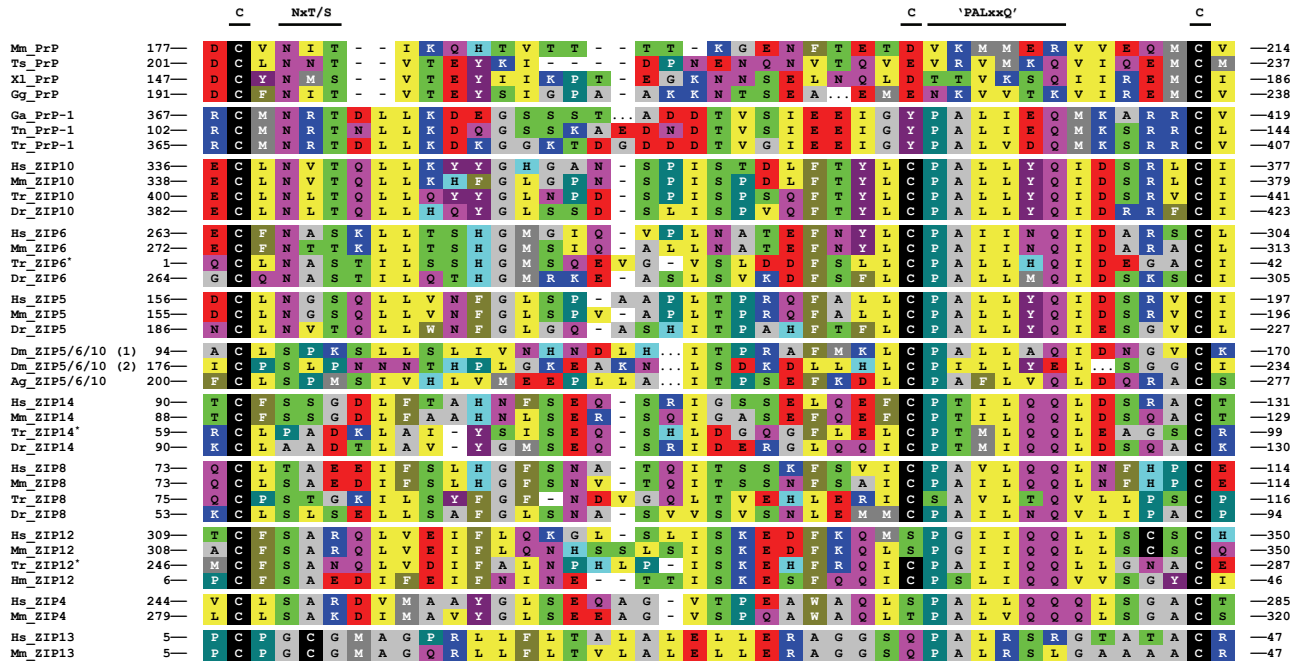

\* Complete sequences not available.

- Ag → *Anopheles gambiae* (African malaria mosquito)
- Dm → *Drosophila melanogaster* (fruit fly)
- Dr → *Danio rerio* (zebrafish)
- Ga → *Gasterosteus aculeatus* (three-spined stickleback)
- Gg → *Gallus gallus* (chicken)
- Hm → *Hydra magnipapillata* (hydra)
- Hs → *Homo sapiens* (human)
- Mm → *Mus musculus* (house mouse)
- Tn → *Tetraodon nigroviridis* (spotted green pufferfish)
- Tr → *Takifugu rubripes* (Japanese pufferfish)
- Ts → *Trachemys scripta* (red-eared slider turtle)
- XI → *Xenopus laevis* (African clawed frog)
