# Supplementary material for: Evolutionary Descent of Prion Genes from the ZIP Family of Metal Ion Transporters
Source: PubMed Central journal article supplement (PMC2745754; doi:10.1371/journal.pone.0007208), 2009-09-28
Supplement: pone.0007208.s004.pdf [file pone.0007208.s004.pdf]

## Supplemental Table 1

| Accession number | Symbol                   | Protein                        | Conf         | Sequence                    | Modifications                                          | Cleavages                         | dMass   | Prec MW | Prec m/z | Theor MW | Theor m/z | Theor z | Area 114 | Area 115 | Area 116 | Area 117 |      |      |      |      |
|------------------|--------------------------|--------------------------------|--------------|-----------------------------|--------------------------------------------------------|-----------------------------------|---------|---------|----------|----------|-----------|---------|----------|----------|----------|----------|------|------|------|------|
| IPIIPI00131622.1 | DPL                      | doppel                         | 99           | HDCFWLER                    | ITRAQ4plex@N-term; Pyridylethyl(C)@2                   |                                   | -0.03   | 1353.61 | 452.21   | 1353.64  | 452.22    | 3       | 6.0      | 89.0     | 3.4      | 1.6      |      |      |      |      |
|                  |                          |                                | 99           | VAENRPGAF                   | ITRAQ4plex@N-term                                      | cleaved F-I@C-term                | 0.00    | 1103.58 | 552.80   | 1103.58  | 552.80    | 2       | 0.7      | 94.7     | 1.7      | 2.9      |      |      |      |      |
|                  |                          |                                | 99           | VLPSSGGQITEAR               | ITRAQ4plex@N-term                                      |                                   | -0.01   | 1457.79 | 729.90   | 1457.80  | 729.91    | 2       | 0.1      | 98.1     | 1.2      | 0.6      |      |      |      |      |
|                  |                          |                                | 99           | LDIDFGAEGNR                 | ITRAQ4plex@N-term                                      |                                   | -0.02   | 1349.65 | 675.83   | 1349.67  | 675.84    | 2       | 1.3      | 94.3     | 2.6      | 1.7      |      |      |      |      |
|                  |                          |                                | 99           | VLPSSGGQITEAR               | ITRAQ4plex@N-term; Ala->Val@12                         |                                   | 0.01    | 1485.84 | 496.29   | 1485.83  | 496.28    | 3       | 1.6      | 89.9     | 2.4      | 6.0      |      |      |      |      |
|                  |                          |                                | 99           | VLPSSGGQITEARVAENRPGAFIKQGR | ITRAQ4plex@N-term; Asn->His@17; Lys->Glu@24            | missed R-V@13; missed K-Q@24      | 0.00    | 3005.59 | 752.41   | 3005.59  | 752.41    | 4       | 3.9      | 89.9     | 4.1      | 2.1      |      |      |      |      |
|                  |                          |                                | 99           | VLPSSGGQITEAR               | ITRAQ4plex@N-term; Deamidated(O)@8; Dimethyl(R)@13     |                                   | 0.06    | 1486.87 | 496.63   | 1486.81  | 496.61    | 3       | 1.0      | 91.2     | 4.4      | 3.3      |      |      |      |      |
|                  |                          |                                | 99           | KVLPSGGQITEAR               | ITRAQ4plex@N-term; ITRAQ4plex(K)@1                     | missed K-V@1                      | -0.02   | 1729.97 | 577.66   | 1729.99  | 577.67    | 3       | 1.7      | 91.0     | 4.1      | 3.2      |      |      |      |      |
|                  |                          |                                | 99           | KLDIDFGAEGNR                | ITRAQ4plex@N-term; ITRAQ4plex(K)@1                     | missed K-L@1                      | -0.04   | 1621.83 | 541.62   | 1621.87  | 541.63    | 3       | 2.4      | 87.6     | 6.3      | 3.7      |      |      |      |      |
|                  |                          |                                | 99           | KVLPSGGQITEAR               | ITRAQ4plex@N-term; ITRAQ4plex(K)@1; HexNac(T)@11       | missed K-V@1                      | 0.02    | 1933.09 | 645.37   | 1933.07  | 645.36    | 3       | 2.5      | 92.2     | 3.3      | 2.0      |      |      |      |      |
|                  |                          |                                | 99           | VAENRPGAFIK                 | ITRAQ4plex@N-term; ITRAQ4plex(K)@11                    |                                   | 0.96    | 1489.83 | 497.62   | 1488.97  | 497.30    | 3       | 0.0      | 99.4     | 0.0      | 0.6      |      |      |      |      |
|                  |                          |                                | 99           | VAENRPGAFIK                 | ITRAQ4plex@N-term; Lys->Arg@11                         |                                   | -0.05   | 1372.72 | 687.37   | 1372.77  | 687.39    | 2       | 1.0      | 95.6     | 1.5      | 1.6      |      |      |      |      |
| 92               | KVLPSGGQITEAR            | ITRAQ4plex@N-term; Lys->Gln@1  | missed K-V@1 | 0.05                        | 1585.90                                                | 529.64                            | 1585.85 | 529.63  | 3        | 3.5      | 89.0      | 3.8     | 3.7      |          |          |          |      |      |      |      |
|                  |                          |                                |              |                             |                                                        |                                   |         |         |          |          |           |         | Average: | 2.0      | 92.5     | 3.0      | 2.5  |      |      |      |
|                  |                          |                                |              |                             |                                                        |                                   |         |         |          |          |           |         | StDev:   | 1.7      | 3.7      | 1.6      | 1.5  |      |      |      |
| IPIIPI00120793.1 | PRNP                     | prion protein                  | 99           | HVAGAAAAGAVVGLGGYMLGSMSR    | ITRAQ4plex@N-term                                      | cleaved R-P@C-term                | 0.03    | 2474.29 | 825.77   | 2474.26  | 825.76    | 3       | 7.0      | 25.9     | 55.7     | 11.5     |      |      |      |      |
|                  |                          |                                | 96           | QHTVTTTTK                   | Gln->pyro-Gln@N-term; ITRAQ4plex(K)@9                  |                                   | 0.02    | 1142.62 | 572.32   | 1142.61  | 572.31    | 2       | 2.2      | 24.0     | 61.0     | 12.8     |      |      |      |      |
|                  |                          |                                | 99           | PMIHFGNDWEDR                | ITRAQ4plex@N-term                                      | cleaved R-P@N-term                | 0.06    | 1659.82 | 554.28   | 1659.76  | 554.26    | 3       | 6.1      | 26.8     | 55.3     | 11.8     |      |      |      |      |
|                  |                          |                                | 97           | ESQAYYDGR                   | ITRAQ4plex@N-term                                      |                                   | 0.00    | 1231.56 | 616.79   | 1231.56  | 616.79    | 2       | 3.4      | 11.5     | 76.4     | 8.6      |      |      |      |      |
|                  |                          |                                | 99           | VVEQMVCVTQYQK               | ITRAQ4plex@N-term; Pyridylethyl(C)@6; ITRAQ4plex(K)@12 |                                   | -0.09   | 1847.86 | 616.96   | 1847.95  | 616.99    | 3       | 1.1      | 14.2     | 76.9     | 7.7      |      |      |      |      |
|                  |                          |                                |              |                             |                                                        |                                   |         |         |          |          |           |         |          |          |          | Average: | 4.0  | 20.5 | 65.1 | 10.5 |
|                  |                          |                                |              |                             |                                                        |                                   |         |         |          |          |           |         | StDev:   | 2.5      | 7.1      | 10.8     | 2.2  |      |      |      |
| IPIIPI00226455.1 | SPRN                     | shadoo                         | 99           | ICLLGGTLGALELRP             | ITRAQ4plex@N-term; Pyridylethyl(C)@2                   |                                   | -0.01   | 2000.19 | 667.74   | 2000.20  | 667.74    | 3       | 0.0      | 6.9      | 32.4     | 60.7     |      |      |      |      |
|                  |                          |                                | 99           | VAAAGAAAGAAAGVAGLATGSGWR    | ITRAQ4plex@N-term                                      |                                   | -0.04   | 2198.13 | 733.72   | 2198.17  | 733.73    | 3       | 0.0      | 21.6     | 18.3     | 60.1     |      |      |      |      |
|                  |                          |                                | 99           | YGSLSLR                     | ITRAQ4plex@N-term                                      |                                   | 0.00    | 825.45  | 413.73   | 825.45   | 413.73    | 2       | 0.8      | 2.3      | 23.2     | 73.8     |      |      |      |      |
|                  |                          |                                | 99           | VAAAGAAAGAAAGVAGLATGSGWR    | ITRAQ4plex@N-term; Oxidation(W)@24                     |                                   | -0.01   | 2214.15 | 739.06   | 2214.16  | 739.06    | 3       | 8.0      | 13.4     | 15.0     | 63.5     |      |      |      |      |
|                  |                          |                                | 99           | VAAAGAAAGAAAGVAGLATGSGWR    | ITRAQ4plex@N-term; Val->Asn@14                         |                                   | 0.05    | 2213.19 | 738.74   | 2213.14  | 738.72    | 3       | 7.1      | 12.9     | 15.4     | 64.7     |      |      |      |      |
| 99               | VAAAGAAAGAAAGVAGLATGSGWR | ITRAQ4plex@N-term; Val->Met@14 |              | 0.07                        | 2230.21                                                | 744.41                            | 2230.14 | 744.39  | 3        | 1.4      | 11.1      | 18.8    | 68.7     |          |          |          |      |      |      |      |
|                  |                          |                                |              |                             |                                                        |                                   |         |         |          |          |           |         | Average: | 2.9      | 11.4     | 20.5     | 65.2 |      |      |      |
|                  |                          |                                |              |                             |                                                        |                                   |         |         |          |          |           |         | StDev:   | 3.7      | 6.5      | 6.5      | 5.2  |      |      |      |
| IPIIPI00469000.4 | SLC39A6                  | ZIP6                           | 99           | ESASSSEVTSVAVNAVSEGTR       | ITRAQ4plex@N-term                                      |                                   | 0.01    | 2274.08 | 759.03   | 2274.07  | 759.03    | 3       | 3.7      | 29.2     | 35.9     | 31.2     |      |      |      |      |
|                  |                          |                                | 95           | AGMIVK                      | ITRAQ4plex@N-term; Dehydrated(T)@4; ITRAQ4plex(K)@6    |                                   | -0.03   | 975.48  | 438.75   | 975.51   | 438.76    | 2       | 31.1     | 2.2      | 31.1     | 31.9     | 34.8 |      |      |      |
|                  |                          |                                | 99           | YDSQLSSNEEK                 | ITRAQ4plex@N-term; Lys->Gln@11                         |                                   | 0.06    | 1442.69 | 722.35   | 1442.63  | 722.32    | 2       | 3.7      | 29.2     | 30.5     | 36.6     |      |      |      |      |
|                  |                          |                                |              |                             |                                                        |                                   |         |         |          |          |           |         | Average: | 3.2      | 29.9     | 32.8     | 34.2 |      |      |      |
|                  |                          |                                |              |                             |                                                        |                                   |         |         |          |          |           |         | StDev:   | 0.8      | 1.1      | 2.8      | 2.8  |      |      |      |
| IPIIPI00273801.3 | SLC39A10                 | ZIP10                          | 99           | QSTEESTIGR                  | ITRAQ4plex@N-term                                      |                                   | 0.03    | 1250.65 | 626.33   | 1250.62  | 626.32    | 2       | 2.3      | 39.3     | 15.7     | 42.7     |      |      |      |      |
|                  |                          |                                | 98           | NYLGVEEEEK                  | ITRAQ4plex@N-term; Lys->Gln@9                          |                                   | 0.07    | 1223.65 | 612.83   | 1223.58  | 612.80    | 2       | 2.5      | 33.2     | 17.7     | 46.5     |      |      |      |      |
|                  |                          |                                |              |                             |                                                        |                                   |         |         |          |          |           |         | Average: | 2.4      | 36.3     | 16.7     | 44.6 |      |      |      |
|                  |                          |                                |              |                             |                                                        |                                   |         |         |          |          |           |         | StDev:   | 0.2      | 4.3      | 1.4      | 2.7  |      |      |      |
| IPIIPI00110850.1 | ACTB                     | actin                          | 99           | AGFAGDDAPR                  | ITRAQ4plex@N-term                                      |                                   | 0.02    | 1119.56 | 560.79   | 1119.54  | 560.78    | 2       | 27.5     | 13.1     | 37.0     | 22.4     |      |      |      |      |
|                  |                          |                                | 99           | AVFPSVGR                    | ITRAQ4plex@N-term                                      | cleaved R-P@C-term                | -0.02   | 1088.63 | 545.32   | 1088.65  | 545.33    | 2       | 27.2     | 13.0     | 27.9     | 31.9     |      |      |      |      |
|                  |                          |                                | 99           | AVFPSVGRPR                  | ITRAQ4plex@N-term                                      |                                   | -0.01   | 1341.79 | 448.27   | 1341.80  | 448.27    | 3       | 24.9     | 19.8     | 33.3     | 22.0     |      |      |      |      |
|                  |                          |                                | 99           | AVFPSVGRPR                  | ITRAQ4plex@N-term; Deamidated(R)@9                     |                                   | -0.03   | 1342.76 | 448.59   | 1342.78  | 448.60    | 3       | 25.5     | 14.2     | 33.8     | 26.5     |      |      |      |      |
|                  |                          |                                | 84           | AVFPSVGRPR                  | ITRAQ4plex@N-term; Dimethyl(R)@11                      |                                   | 0.01    | 1369.85 | 457.62   | 1369.83  | 457.62    | 3       | 28.8     | 16.8     | 32.9     | 21.5     |      |      |      |      |
|                  |                          |                                | 99           | DLTDYLMK                    | ITRAQ4plex@N-term; ITRAQ4plex(K)@8                     |                                   | 0.00    | 1285.68 | 643.85   | 1285.68  | 643.85    | 2       | 18.2     | 23.6     | 37.5     | 20.7     |      |      |      |      |
|                  |                          |                                | 99           | DLTDYLMK                    | ITRAQ4plex@N-term; Lys->Gln@8                          |                                   | 0.02    | 1141.57 | 571.79   | 1141.54  | 571.78    | 2       | 10.6     | 8.5      | 30.5     | 50.4     |      |      |      |      |
|                  |                          |                                | 99           | DLYANTVLSGGTMYPGIADR        | ITRAQ4plex@N-term                                      |                                   | 0.13    | 2358.29 | 787.10   | 2358.16  | 787.06    | 3       | 11.0     | 29.3     | 30.3     | 29.4     |      |      |      |      |
|                  |                          |                                | 99           | DLYANTVLSGGTMYPGIADR        | ITRAQ4plex@N-term; Dimethyl(R)@21                      |                                   | -0.02   | 2386.23 | 796.42   | 2386.20  | 796.41    | 3       | 30.1     | 18.6     | 0.0      | 51.3     |      |      |      |      |
|                  |                          |                                | 99           | DLYANTVLSGGTMYPGIADR        | ITRAQ4plex@N-term; Leu->Pro@2                          |                                   | -0.02   | 2342.12 | 781.71   | 2342.13  | 781.72    | 3       | 5.7      | 28.2     | 29.4     | 36.7     |      |      |      |      |
|                  |                          |                                | 99           | DSYVGDEAQS                  | ITRAQ4plex@N-term; Dehydrated(S)@2; Lys->Gln@11        |                                   | 0.04    | 1323.61 | 662.81   | 1323.57  | 662.79    | 2       | 29.3     | 8.9      | 29.6     | 32.2     |      |      |      |      |
|                  |                          |                                | 99           | DSYVGDEAQS                  | ITRAQ4plex@N-term; ITRAQ4plex(K)@11                    |                                   | 0.04    | 1485.76 | 496.26   | 1485.72  | 496.25    | 3       | 22.5     | 29.7     | 31.8     | 16.0     |      |      |      |      |
|                  |                          |                                | 99           | DSYVGDEAQS                  | ITRAQ4plex@N-term; Lys->Arg@11                         |                                   | 0.04    | 1369.67 | 685.84   | 1369.62  | 685.82    | 2       | 21.7     | 10.8     | 31.2     | 36.4     |      |      |      |      |
|                  |                          |                                | 99           | DSYVGDEAQS                  | ITRAQ4plex@N-term; Lys->Gln@11                         |                                   | 0.04    | 1341.62 | 671.82   | 1341.58  | 671.80    | 2       | 21.6     | 9.4      | 33.0     | 35.9     |      |      |      |      |
|                  |                          |                                | 87           | DSYVGDEAQS                  | ITRAQ4plex@N-term; Ser->Asp@10; ITRAQ4plex(K)@11       |                                   | -0.01   | 1513.72 | 505.58   | 1513.71  | 505.58    | 3       | 28.7     | 17.7     | 34.1     | 21.6     |      |      |      |      |
|                  |                          |                                | 92           | DSYVGDEAQS                  | ITRAQ4plex@N-term; Ser->Val@10; ITRAQ4plex(K)@11       |                                   | 0.01    | 1497.76 | 500.26   | 1497.76  | 500.26    | 3       | 27.3     | 25.1     | 28.8     | 18.8     |      |      |      |      |
|                  |                          |                                | 99           | DSYVGDEAQS                  | ITRAQ4plex@N-term; ITRAQ4plex(K)@11                    | missed K-R@11                     | 0.04    | 1641.86 | 548.29   | 1641.82  | 548.28    | 3       | 17.9     | 32.4     | 44.2     | 5.5      |      |      |      |      |
|                  |                          |                                | 96           | DSYVGDEAQS                  | ITRAQ4plex@N-term; Lys->Gln@11                         | missed K-R@11                     | 0.08    | 1497.76 | 500.26   | 1497.68  | 500.23    | 3       | 19.9     | 30.0     | 36.4     | 16.4     |      |      |      |      |
|                  |                          |                                | 80           | EITALPSTMK                  | Glu->pyro-Glu@N-term; ITRAQ4plex(K)@11                 |                                   | 0.06    | 1286.76 | 644.39   | 1286.70  | 644.36    | 2       | 25.0     | 12.1     | 33.5     | 29.5     |      |      |      |      |
|                  |                          |                                | 89           | EITALPSTMK                  | ITRAQ4plex@N-term; Lys->Arg@11                         |                                   | 0.01    | 1332.73 | 667.37   | 1332.72  | 667.37    | 2       | 19.8     | 11.4     | 33.8     | 35.0     |      |      |      |      |
|                  |                          |                                | 89           | EITALPSTMK                  | ITRAQ4plex@N-term; Lys->Gln@11                         |                                   | 0.07    | 1304.75 | 653.38   | 1304.68  | 653.35    | 2       | 23.7     | 19.2     | 32.7     | 27.4     |      |      |      |      |
|                  |                          |                                | 99           | EITALPSTMKI                 | ITRAQ4plex@N-term; Lys->Ala@11; Ile->Ala@12            | cleaved I-K@C-term; missed K-I@11 | 0.01    | 1318.70 | 660.36   | 1318.69  | 660.35    | 2       | 18.0     | 8.7      | 28.2     | 45.1     |      |      |      |      |
|                  |                          |                                | 99           | GYSFTTAAER                  | ITRAQ4plex@N-term                                      |                                   | 0.00    | 1275.63 | 638.82   | 1275.62  | 638.82    | 2       | 13.6     | 14.7     | 36.8     | 34.9     |      |      |      |      |
|                  |                          |                                | 99           | GYSFTTAAER                  | ITRAQ4plex@N-term; Dimethyl(R)@10                      |                                   | 0.05    | 1303.71 | 652.86   | 1303.65  | 652.83    | 2       | 22.5     | 6.8      | 32.6     | 38.0     |      |      |      |      |
|                  |                          |                                | 99           | HQGVVMGMQK                  | ITRAQ4plex@N-term; ITRAQ4plex(K)@11                    |                                   | 0.00    | 1458.77 | 487.26   | 1458.77  | 487.26    | 3       | 14.5     | 30.6     | 37.5     | 17.4     |      |      |      |      |
|                  |                          |                                | 90           | HQGVVMGMQK                  | ITRAQ4plex@N-term; Lys->Arg@11                         |                                   | 0.03    | 1342.70 | 448.57   | 1342.67  | 448.56    | 3       | 11.4     | 13.7     | 34.2     | 40.7     |      |      |      |      |
|                  |                          |                                | 99           | HQGVVMGMQK                  | ITRAQ4plex@N-term; Lys->Gln@11                         |                                   | 0.05    | 1314.68 | 439.23   | 1314.63  | 439.22    | 3       | 14.2     | 22.0     | 31.8     | 32.0     |      |      |      |      |
|                  |                          |                                | 99           | KDLYANTVLSGGTMYPGIADR       | ITRAQ4plex@N-term; ITRAQ4plex(K)@1                     |                                   | 0.04    | 2630.40 | 658.61   | 2630.36  | 658.60    | 4       | 12.5     | 33.2     | 28.5     | 25.8     |      |      |      |      |
|                  |                          |                                | 99           | LDLAGRDLTDYLMK              | ITRAQ4plex@N-term; ITRAQ4plex(K)@14                    | missed R-D@6                      | 0.01    | 1911.05 | 638.02   | 1911.04  | 638.02    | 3       | 40.6     | 15.9     | 32.7     | 10.8     |      |      |      |      |
|                  |                          |                                | 99           | MTQIMFETFNTPAMYVAIQVLSYASGR | ITRAQ4plex@N-term                                      |                                   | 0.07    | 3396.77 | 850.20   | 3396.70  | 850.18    | 4       | 8.9      | 52.0     | 28.3     | 10.8     |      |      |      |      |
|                  |                          |                                | 99           | QYDESGPSVHR                 | ITRAQ4plex@N-term                                      |                                   | 0.04    | 1659.84 | 554.29   | 1659.80  | 554.27    | 3       | 6.6      | 42.9     | 29.0     | 21.5     |      |      |      |      |
|                  |                          |                                | 99           | SYELPDGOVITIGNER            | ITRAQ4plex@N-term                                      |                                   | -0.02   | 1933.97 | 645.66   | 1933.99  | 645.67    | 3       | 11.2     | 41.0     | 30.4     | 17.5     |      |      |      |      |
|                  |                          |                                | 99           | SYELPDGOVITIGNER            | ITRAQ4plex@N-term; Asn->Arg@14                         |                                   | 0.01    | 1976.05 | 659.69   | 1976.04  | 659.69    | 3       | 18.3     | 20.0     | 36.3     | 25.4     |      |      |      |      |
|                  |                          |                                | 99           | SYELPDGOVITIGNER            | ITRAQ4plex@N-term; Asp->Pro@6                          |                                   | -0.08   | 1915.93 | 639.65   | 1916.01  | 639.68    | 3       | 5.5      | 16.6     | 32.5     | 45.4     |      |      |      |      |
|                  |                          |                                | 99           | SYELPDGOVITIGNER            | ITRAQ4plex@N-term; Deamidated(N)@14; Glu->Arg@15       |                                   | 0.02    | 1962.05 | 655.02   | 1962.03  | 655.02    | 3       | 20.0     | 23.6     | 28.9     | 27.5     |      |      |      |      |
|                  |                          |                                | 99           | SYELPDGOVITIGNER            | ITRAQ                                                  |                                   |         |         |          |          |           |         |          |          |          |          |      |      |      |      |
