# Supplementary material for: Evolutionary Descent of Prion Genes from the ZIP Family of Metal Ion Transporters
Source: PLoS One. 2009 Sep 28;4(9):e7208. doi: 10.1371/journal.pone.0007208 (PMC2745754; doi:10.1371/journal.pone.0007208)
Supplement: Table S2 — (0.10 MB PDF) [file pone.0007208.s005.pdf]

**Supplemental Table 2:** Summary of evidences presented in support of evolutionary descent of PrP gene family from ZIP metal ion transport ancestor gene.

| Evidence Category       | Description of Evidences                                                                                                                                                                                                                                                                                                                                                                                                                                                                                                                                                                                                                                                                                                                                                                                                                                                                                                                                                                                                                                                                                                 |
|-------------------------|--------------------------------------------------------------------------------------------------------------------------------------------------------------------------------------------------------------------------------------------------------------------------------------------------------------------------------------------------------------------------------------------------------------------------------------------------------------------------------------------------------------------------------------------------------------------------------------------------------------------------------------------------------------------------------------------------------------------------------------------------------------------------------------------------------------------------------------------------------------------------------------------------------------------------------------------------------------------------------------------------------------------------------------------------------------------------------------------------------------------------|
| <i>1. Sequence</i>      | <ul style="list-style-type: none"> <li>a. ZIP10 constitutes the only non-prion gene hit by SCOP “prion-like” HMM (out of 120,000 entries in LOCATE human-mouse protein database).</li> <li>b. COMPASS profile-profile analysis passed homology E-value threshold and confirmed that similarity of PL domain sequences is not merely restricted to spurious outliers.</li> <li>c. The GPI-attachment sequence of prion gene sequences shows remarkable sequence identity/similarity with the TM1 domain found in ZIPs. Precedents exist for the transformation of a transmembrane sequence into a signal peptide for GPI anchor attachment.</li> <li>d. An additional pair of ZIP and prion gene sequences (zebrafish ZIP5 / pufferfish Sho2) exhibits a degree of sequence identity/similarity which falls on the significance threshold indicating homology.</li> <li>e. ZIP genes contain histidine-rich repeat motifs reminiscent of octarepeats in prion sequences.</li> <li>f. A zebrafish PrP sequence has been documented which shares the presence of N-terminal [HX]<sub>n</sub> clusters with ZIPs.</li> </ul> |
| <i>2. Structure</i>     | <ul style="list-style-type: none"> <li>a. A common distance of cysteine-flanked core domains to membrane attachment sites is observed in both prion and ZIP protein families.</li> <li>b. Precedents of protein families exist with individual members employing transmembrane domains or GPI anchors for membrane attachment.</li> <li>c. A systematic attempt to thread ZIPs 5/6/10 to any protein structure in the PDB led to the independent assignment of the prion fold.</li> <li>d. The prion protein structures are the only fold templates onto which ZIP sequences can be threaded with scores that pass the threshold for significant homology.</li> <li>e. ZIPs 5/6/10 are expected to display dichotomy of disordered N-terminal sequences and globular PL domains, reminiscent of prion proteins.</li> </ul>                                                                                                                                                                                                                                                                                               |
| <i>3. Function</i>      | <ul style="list-style-type: none"> <li>a. Consistent with multiple lines of evidence suggesting that proteins harboring the prion fold can bind to each other, ZIP proteins co-purified with prion proteins in this study.</li> <li>b. While many proteins are known to bind divalent cations, PrP and ZIPs belong to a small group of proteins known to capture divalent cations at multiple binding sites embedded within disordered extracellular domains.</li> <li>c. Both the prion protein and ZIPs 5/6/10 have been shown to transport zinc ions across the plasma membrane.</li> <li>d. ZIP6 and PrP knockouts have been shown to display a rare common phenotype in zebrafish (inhibition of gastrulation / altered E-cadherin expression).</li> </ul>                                                                                                                                                                                                                                                                                                                                                          |
| <i>4. Localization</i>  | <ul style="list-style-type: none"> <li>a. ZIPs 5/6/10 and prion proteins share localization to the plasma membrane.</li> <li>b. ZIPs 5/6/10 display common orientation of shared sequence motifs with regard to the plasma membrane.</li> <li>c. Predominant tissues of expression of ZIPs 5/6/10 are reminiscent of PrP/Sho/Dpl gene expression profiles.</li> </ul>                                                                                                                                                                                                                                                                                                                                                                                                                                                                                                                                                                                                                                                                                                                                                    |
| <i>5. Phylogenetics</i> | <ul style="list-style-type: none"> <li>a. Comparison of orthologous ZIP and prion sequences indicates divergent sequence evolution consistent with phylogenetic relationships.</li> <li>b. ZIPs 6/10 identified to bind to members of mammalian prion protein family populate a common phylogenetic branch and represent the subset of mouse ZIPs (out of fourteen ZIP paralogs) which objectively display the strongest sequence similarity to prion gene sequences.</li> <li>c. A simple and plausible model for the emergence of the prion gene family in Chordata exists.</li> </ul>                                                                                                                                                                                                                                                                                                                                                                                                                                                                                                                                 |
